# Supplementary material for: Requirement for Golgi-localized PI(4)P in fusion of COPII vesicles with Golgi compartments
Source: PubMed Central journal article supplement — Mol Biol Cell. 2011 Jan 15;22(2):216–29. doi: 10.1091/mbc.E10-04-0317 (PMC3020917; doi:10.1091/mbc.e10-04-0317), 2011-01-15
Supplement: E10-04-0317_1.pdf [file E10-04-0317_1.pdf]

## SUPPLEMENTAL MATERIALS

### Requirement for Golgi-localized PI(4)P in fusion of COPII vesicles with Golgi compartments

Andrés Lorente-Rodríguez and Charles Barlowe

## SUPPLEMENTAL MATERIALS AND METHODS

### Determination of Sac1<sup>WT</sup> phosphatase activity on semi-intact cell membranes under *in vitro* pre-treatment conditions

Washed semi-intact cell membranes were treated with 50  $\mu$ M Sac1<sup>WT</sup> or 50  $\mu$ M Sac1<sup>C392S</sup> as in Figure 4. Membrane lipids were extracted as described (Gray *et al.*, 2003) with minor modifications: 1.5 A<sub>280</sub> units (~1.03 OD<sub>600</sub> units) of treated membranes were independently precipitated in quadruplicate with 5% TCA, 1 mM EDTA in 1.5 ml on ice for 15 min followed by centrifugation. The pellet was washed twice with 1.5 ml ice-cold 5% TCA, 1 mM EDTA, and acidic lipids were extracted and dried. Lipids were reconstituted with 10  $\mu$ l 2:1:0.8 CH<sub>3</sub>OH:CHCl<sub>3</sub>:H<sub>2</sub>O by vortexing and sonication for 5 min at 30°C on a B2200R-1 Branson ultrasonic bath (Branson Ultrasonic Corporation, Danbury, CT). Lipids (4  $\mu$ l) were spotted on a PI(4)P Mass Strip Kit<sup>TM</sup> membrane as indicated by the manufacturer (Echelon Biosciences, Salt Lake City, UT), and developed by chemiluminescence and densitometric analysis as described for immunoblots. A Mann-Whitney-Wilcoxon test to compare the medians was performed on the observed results.

### NEM inactivation of Sac1<sup>WT</sup> phosphatase activity

To inactivate Sac1<sup>WT</sup>, protein (600  $\mu$ g) was incubated at 8°C for 10 min with 50 mM NEM (Maehama *et al.*, 2000). Excess NEM was quenched with 100 mM DTT at 8°C for 10 min, and then dialyzed overnight against buffer 88 without sorbitol containing 0.5 mM DTT. A mock inactivation was performed in parallel using ethanol carrier in place of NEM.

**SUPPLEMENTAL TABLE S1. CANDIDATE STRAINS TESTED FOR FUSION DEFECTS**

| Strain           | Genotype                                            | Study reporting PI(4)P binding <sup>1</sup> |
|------------------|-----------------------------------------------------|---------------------------------------------|
| <i>atg26Δ</i>    | BY4742; <i>atg26Δ::KAN<sup>R</sup></i>              | (Yu <i>et al.</i> , 2004)                   |
| <i>bem3Δ</i>     | BY4742; <i>bem3Δ::KAN<sup>R</sup></i>               | (Zhu <i>et al.</i> , 2001)                  |
| <i>caf120Δ</i>   | BY4742; <i>caf120Δ::KAN<sup>R</sup></i>             | (Yu <i>et al.</i> , 2004)                   |
| <i>cla4Δ</i>     | BY4742; <i>cla4Δ::KAN<sup>R</sup></i>               | (Yu <i>et al.</i> , 2004)                   |
| <i>cog5Δ</i>     | BY4742; <i>cog5Δ::KAN<sup>R</sup></i>               | (Zhu <i>et al.</i> , 2001)                  |
| <i>gcs1Δ</i>     | BY4742; <i>gcs1Δ::KAN<sup>R</sup></i>               | (Zhu <i>et al.</i> , 2001)                  |
| <i>osh1Δ</i>     | BY4742; <i>osh1Δ::KAN<sup>R</sup></i>               | (Yu <i>et al.</i> , 2004)                   |
| <i>osh2Δ</i>     | BY4742; <i>osh2Δ::KAN<sup>R</sup></i>               | (Yu <i>et al.</i> , 2004)                   |
| <i>osh3Δ</i>     | BY4742; <i>osh3Δ::KAN<sup>R</sup></i>               | (Yu <i>et al.</i> , 2004)                   |
| <i>osh1Δ2Δ3Δ</i> | SEY6210; <i>osh1Δ::URA3 osh2Δ::URA3 osh3Δ::LYS2</i> |                                             |
| <i>osh4Δ</i>     | BY4742; <i>osh4Δ::KAN<sup>R</sup></i>               | (Zhu <i>et al.</i> , 2001)                  |
| <i>osh6Δ</i>     | BY4742; <i>osh6Δ::KAN<sup>R</sup></i>               | (Zhu <i>et al.</i> , 2001)                  |
| <i>pdr16Δ</i>    | BY4742; <i>pdr16Δ::KAN<sup>R</sup></i>              | (Zhu <i>et al.</i> , 2001)                  |
| <i>pdr17Δ</i>    | BY4742; <i>pdr17Δ::KAN<sup>R</sup></i>              | (Zhu <i>et al.</i> , 2001)                  |
| <i>rgc1Δ</i>     | BY4742; <i>rgc1Δ::KAN<sup>R</sup></i>               | (Yu <i>et al.</i> , 2004)                   |
| <i>scs2Δ</i>     | BY4742; <i>scs2Δ::KAN<sup>R</sup></i>               | (Zhu <i>et al.</i> , 2001)                  |
| <i>skg3Δ</i>     | BY4742; <i>skg3Δ::KAN<sup>R</sup></i>               | (Yu <i>et al.</i> , 2004)                   |
| <i>spo14Δ</i>    | BY4742; <i>spo14Δ::KAN<sup>R</sup></i>              | (Yu <i>et al.</i> , 2004)                   |
| <i>syt1Δ</i>     | BY4742; <i>syt1Δ::KAN<sup>R</sup></i>               | (Yu <i>et al.</i> , 2004)                   |
| <i>tus1Δ</i>     | BY4742; <i>tus1Δ::KAN<sup>R</sup></i>               | (Yu <i>et al.</i> , 2004)                   |
| <i>vtc4Δ</i>     | BY4742; <i>vtc4Δ::KAN<sup>R</sup></i>               | (Zhu <i>et al.</i> , 2001)                  |
| <i>yel1Δ</i>     | BY4742; <i>yel1Δ::KAN<sup>R</sup></i>               | (Yu <i>et al.</i> , 2004)                   |
| <i>yhr131cΔ</i>  | BY4742; <i>yhr131cΔ::KAN<sup>R</sup></i>            | (Yu <i>et al.</i> , 2004)                   |
| <i>ypr091cΔ</i>  | BY4742; <i>ypr091cΔ::KAN<sup>R</sup></i>            | (Yu <i>et al.</i> , 2004)                   |

<sup>1</sup>Refers to the original study that reported binding of the indicated protein to PI(4)P.

All of the above strains are from the Research Genetics Collection (Brachmann *et al.*, 1998), except for the *osh1Δ2Δ3Δ* strain (Beh *et al.*, 2001). Because our results showed that PI(4)P was required on Golgi membranes for fusion with COPII vesicles, we performed two-stage fusion assays chasing wild type vesicles into acceptor semi-intact cell membranes prepared from the indicated deletion mutants compared to their isogenic wild type. All deletion strains tested above displayed normal fusion levels except for the *gcs1Δ* mutant. Semi-intact cell membranes from the *gcs1Δ* strain exhibited a 47% decrease in fusion efficiency but displayed normal levels of COPII vesicle budding and tethering *in vitro*.

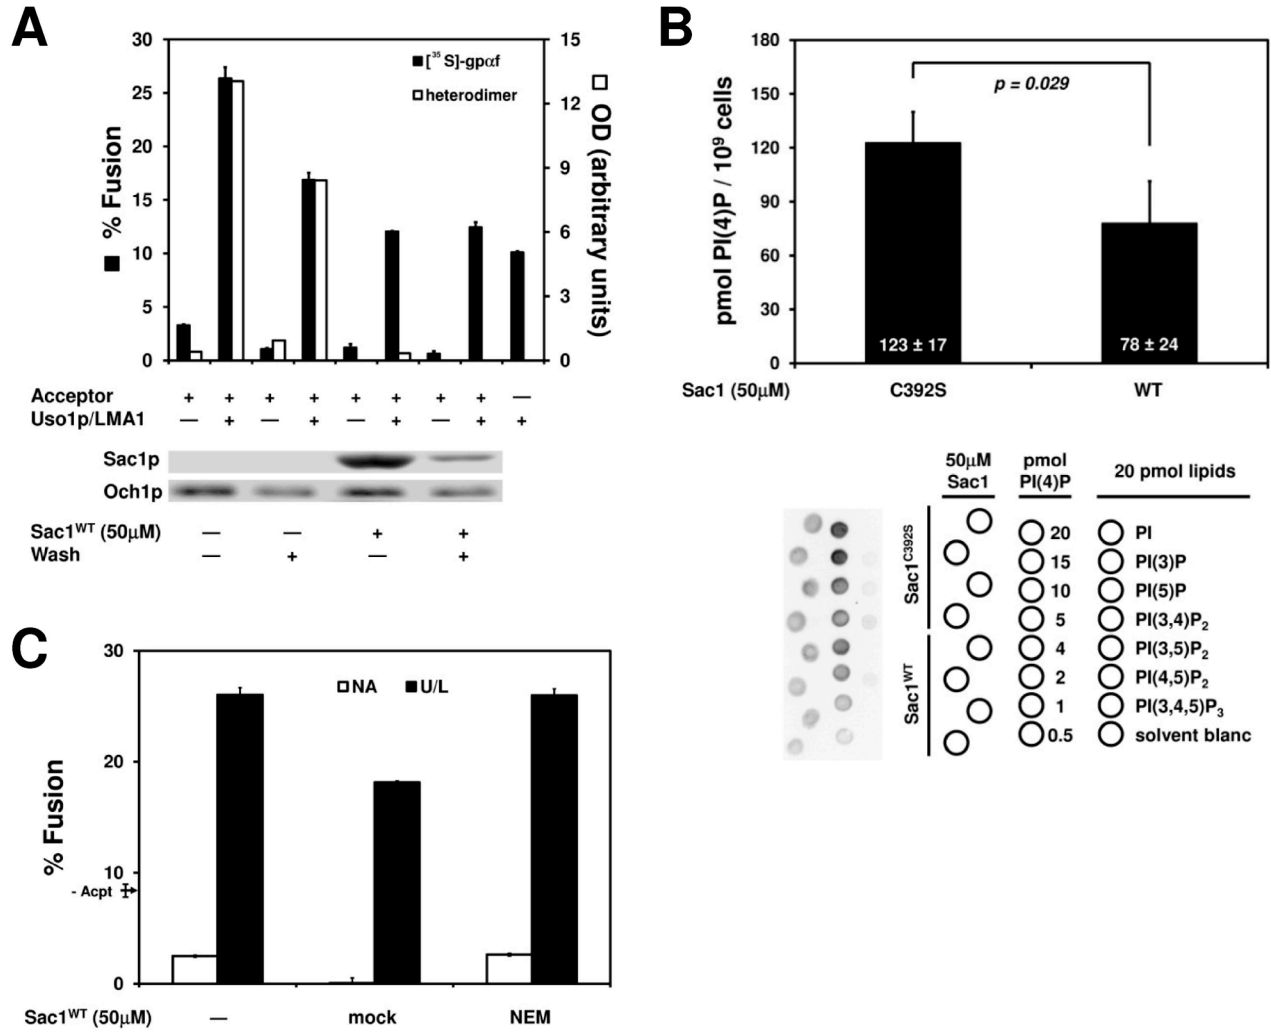

**Supplemental Figure S1.** The Sac1<sup>WT</sup> phosphatase activity is required for inhibition of fusion. (A) Washing excess Sac1<sup>WT</sup> does not rescue fusion inhibition or formation of cross-linked trans-SNARE complexes. Experiment as in Figure 4D monitored formation of cross-linked Bet1p<sup>I83C</sup>-Sec22p<sup>D153C</sup> heterodimers (open bars) and Golgi-modified [<sup>35</sup>S]gpαf fusion (black bars). Ice controls were subtracted as in Figure 4D. Aliquots of treated membranes were immunoblotted for Sac1p using an anti-penta-His antibody and for the Golgi membrane protein Och1p (loading control). Note that the wash removed ~78% Sac1<sup>WT</sup>. (B) Sac1<sup>WT</sup> is catalytically active on semi-intact cell membranes *in vitro* under pre-treatment conditions. Washed semi-intact cell membranes were treated with 50 μM Sac1<sup>WT</sup> or 50 μM Sac1<sup>C392S</sup> as in Figure 4, lipids extracted and levels of PI(4)P/cell quantified using a lipid overlay assay (shown below). Note that PI(4)P levels are reduced by ~37% ( $p=0.029$ ). (C) NEM inactivation of the catalytic phosphatase activity in Sac1<sup>WT</sup> reverses inhibition. Semi-intact cell acceptor membranes pretreated with buffer, 50 μM mock-inactivated Sac1<sup>WT</sup> or 50 μM NEM-inactivated Sac1<sup>WT</sup> as in Figure 4 were used in two-stage fusion reactions as described in Figure 4A. Note that the mock treated Sac1<sup>WT</sup> inhibited fusion while the NEM-inactivated Sac1<sup>WT</sup> did not. The arrow indicates background fusion in the absence of added acceptor membranes.

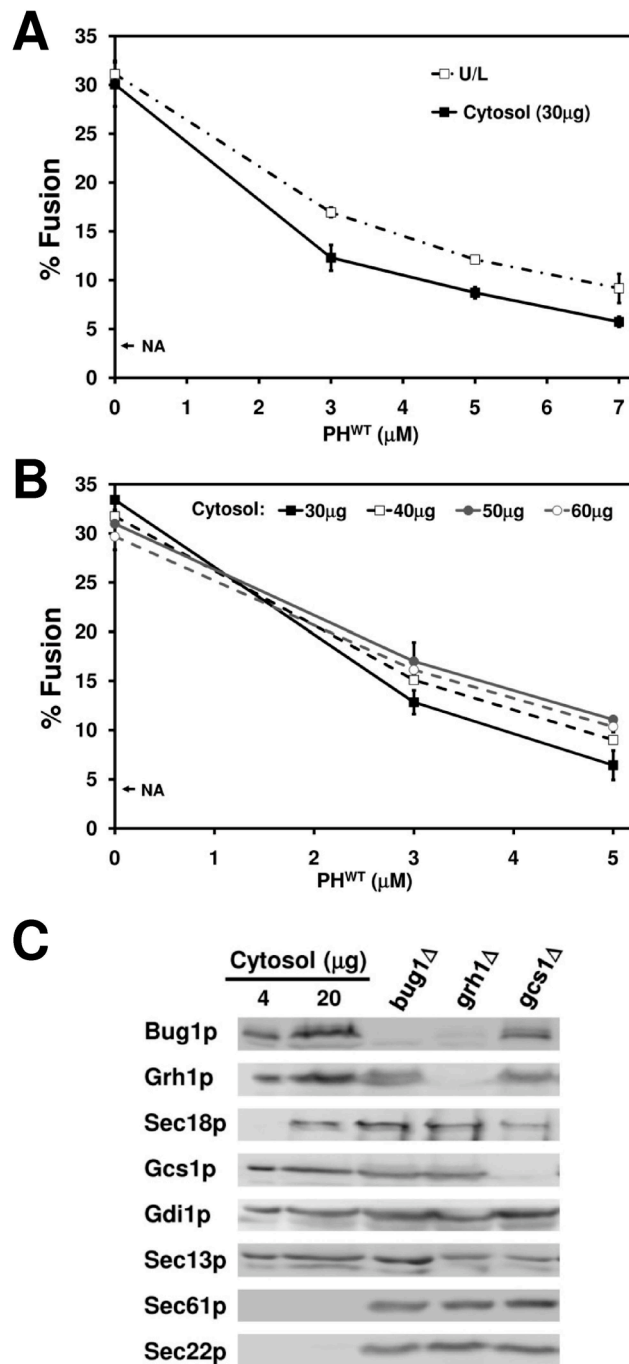

**Supplemental Figure S2.** Cytosol does not reverse PH<sup>WT</sup> inhibition of transport. (A) Two-stage fusion reactions reconstituted with cytosol are sensitive to inhibition with PH<sup>WT</sup> domain. Semi-intact cell acceptor membranes pre-treated with indicated amounts of PH<sup>WT</sup> for 20 min at 4°C were used in two-stage fusion reactions as in Figure 1B. (B) Increasing concentrations of cytosol do not reverse inhibition of fusion by PH<sup>WT</sup> domain. Two-stage fusion reactions using increasing concentrations of cytosol were performed as in panel A. (C) Immunoblot analysis of cytosol. Two different amounts of cytosol were compared to aliquots of semi-intact cell membranes prepared from the indicated deletion strains (Brachmann *et al.*, 1998). Note that Grh1p, Bug1p, Sec18p and Gcs1p are enriched in this cytosol. Antibodies against Gcs1p have been described (Lewis *et al.*, 2004). Cytosol was prepared as described (Barlowe, 1997).

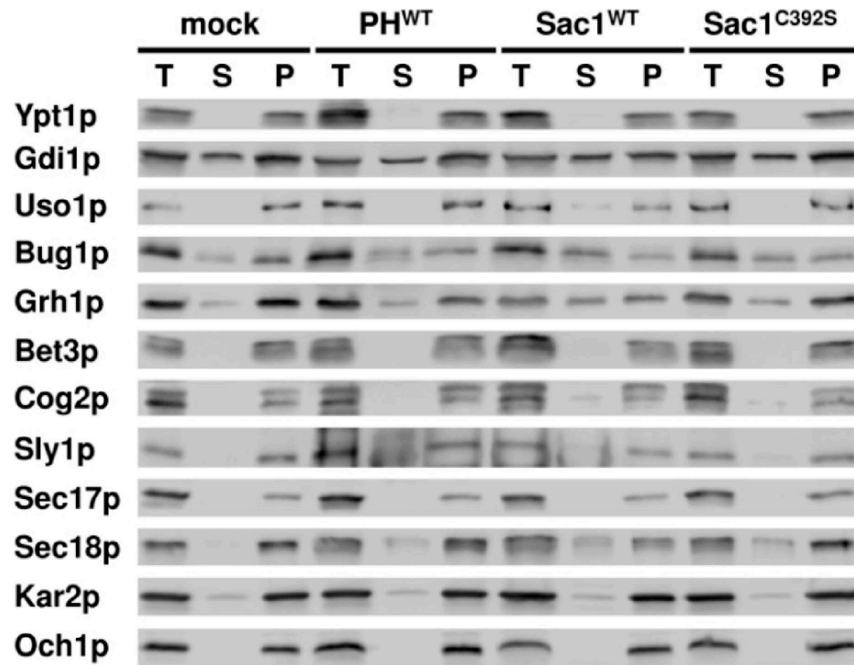

**Supplemental Figure S3.** Membrane association of transport factors after treatment of semi-intact cells with PH<sup>WT</sup>, Sac1<sup>WT</sup> or Sac1<sup>C392S</sup>. Semi-intact cells (65 A<sub>280</sub> units/ml) were pretreated with 50 μM Sac1<sup>WT</sup> for 30 min at 12°C and then diluted in buffer 88 to a final concentration of 12.5 A<sub>280</sub> units/ml. In parallel, semi-intact cells (12.5 A<sub>280</sub> units/ml) were incubated on ice for 20 min with buffer, 7 μM PH<sup>WT</sup> or 5 μM Sac1<sup>C392S</sup>. All reactions were then incubated for 30 min at 23°C and separated into soluble (S100) and pellet (P100) fractions for immunoblot analysis of the Rab GTPase Ypt1p and Rab GDP dissociation inhibitor Gdi1p; the tethering factors Uso1p, Bug1p, Grh1p, Bet3p (TRAPP complex), and Cog2p (COG complex); the fusion factors Sly1p (SM protein), Sec17 (α-SNAP) and Sec18 (NSF); and the control proteins Kar2p (soluble luminal ER chaperone) and Och1p (Golgi membrane marker). Note that these treatments shifted a low level of Sec18p, Grh1p and Bug1p into the soluble fraction whereas other factors were not affected. In the Sly1p immunoblot PH<sup>WT</sup> was detected as a cross-reactive species.

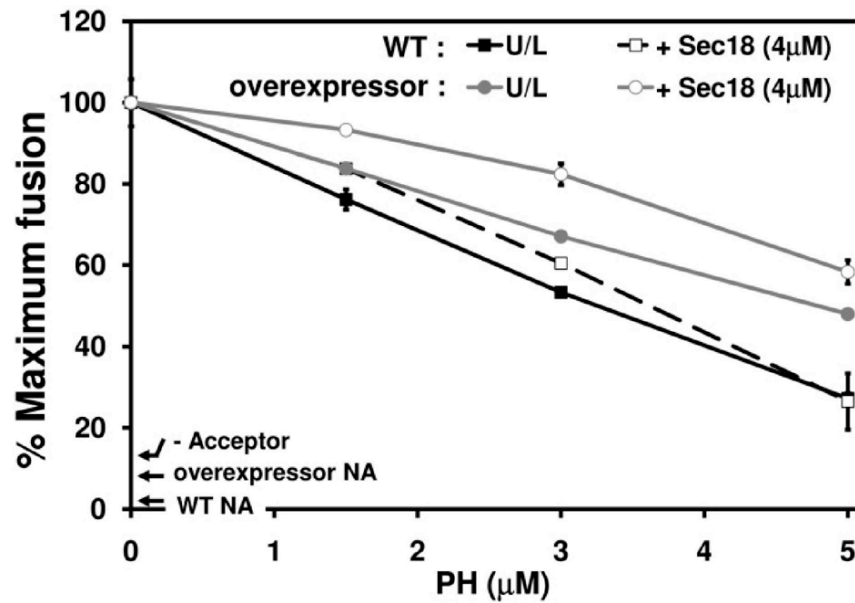

**Supplemental Figure S4.** Overexpression of anterograde ER-Golgi fusion factors partially rescues PH<sup>WT</sup> inhibition. Data in Figure 7C plotted relative to the control transport reaction in the absence of inhibitor. NA is background fusion in the absence of fusion factors. The - Acceptor condition indicates the background fusion in the absence of added semi-intact cell acceptor membranes.

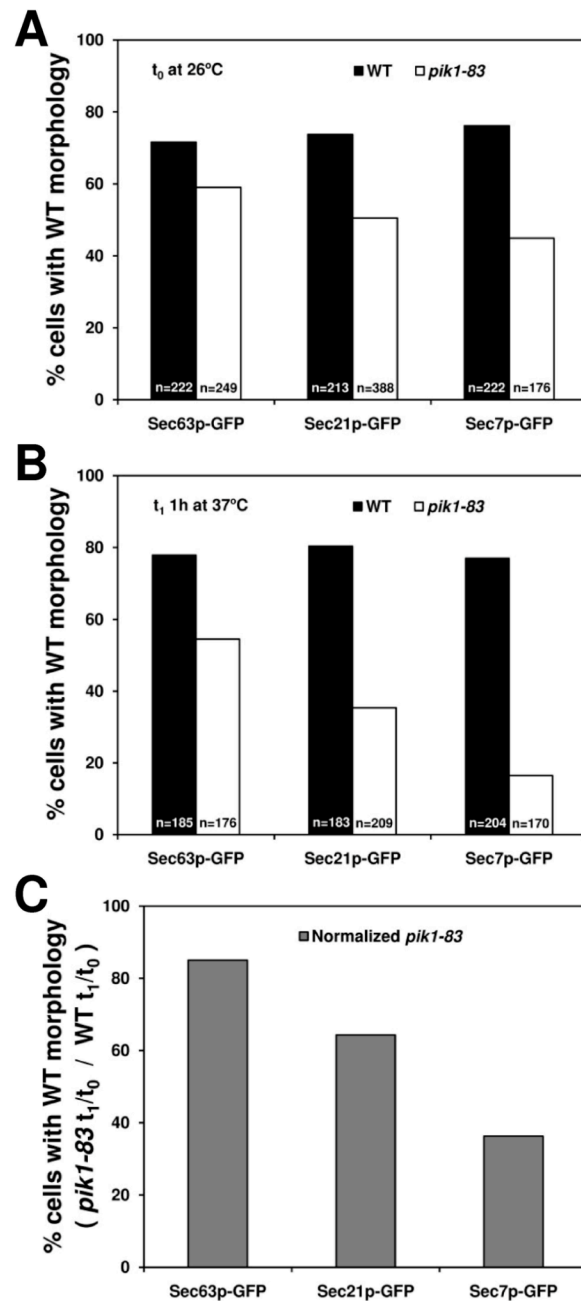

**Supplemental Figure S5.** Quantification of ER and Golgi morphologies in wild type and *pik1-83* cells from Figure 8. (A) ER and Golgi morphologies in GFP-tagged strains after growth at 26°C and (B) after shift to 37°C for 1 h. To quantify ER morphology, cells expressing Sec63p-GFP were scored for the appearance of elaborated and gapped ER structures compared to wild type cells, which exhibited a typical perinuclear and peripheral ER morphology (Prinz *et al.*, 2000). Cis-Golgi structures were assessed in cells expressing Sec21p-GFP where wild type morphology corresponded to 3-8 medium-sized puncta per cell; and trans-Golgi structures in Sec7p-GFP expressing wild type cells corresponded to 2-6 larger puncta per cell (Rossanese *et al.*, 2001). Abnormal Golgi morphologies included smaller and more numerous puncta, as well as ring-like structures that may correspond to Berkeley bodies. (C) Data from panel B was normalized to panel A ( $t_1/t_0$ ), and the *pik1-83*  $t_1/t_0$  data was then normalized to WT  $t_1/t_0$  to account for the defective morphologies at 26°C. The morphological defects in *pik1-83* cells shifted to the restrictive temperature of 37°C are severe at trans-Golgi compartments, moderate at cis-Golgi compartments and minor at ER compartments.

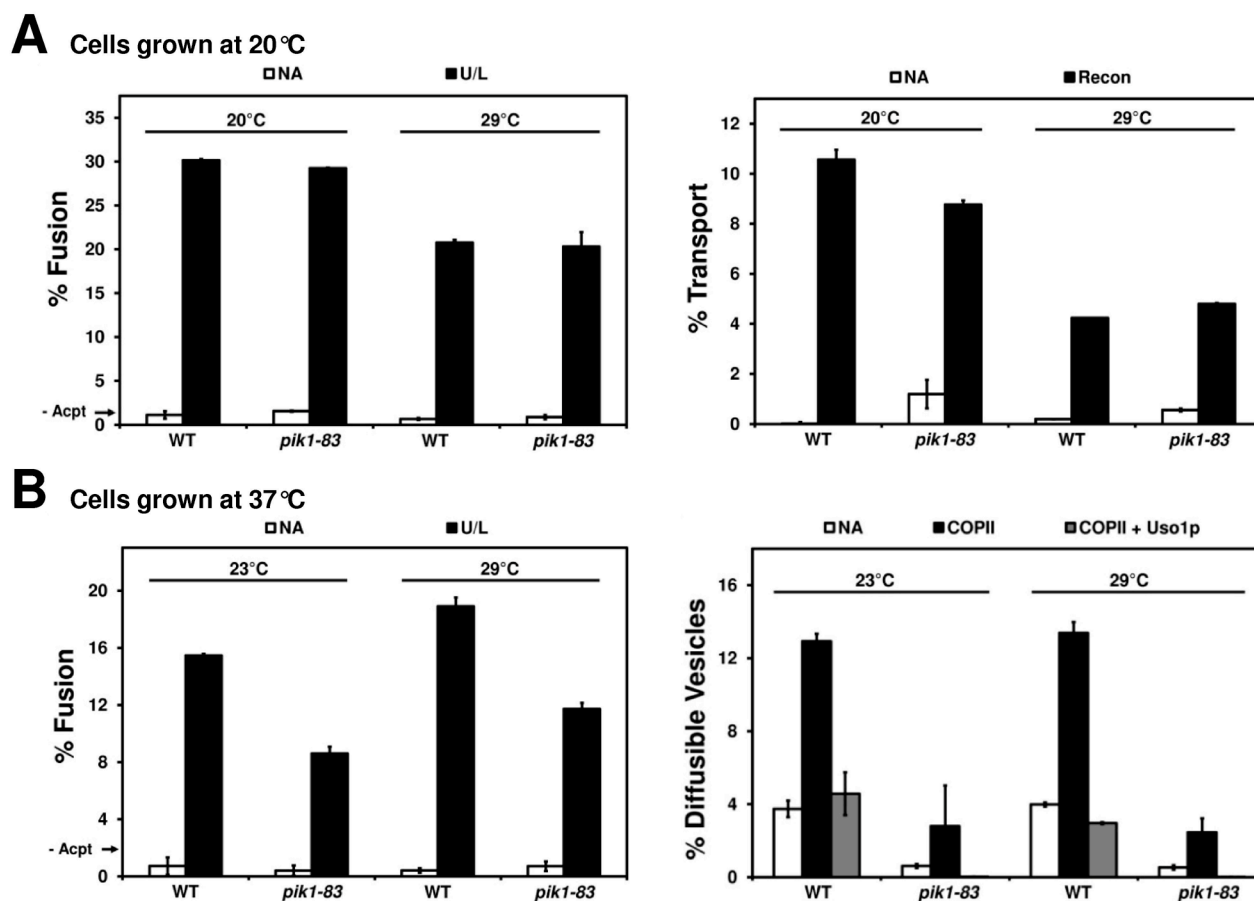

**Supplemental Figure S6.** Analysis of *pik1-83* membranes in cell free transport assays. (A) Semi-intact cells were prepared from wild-type (WT) or *pik1-83* cells grown at 20°C. LEFT: Two-stage fusion reactions performed as in Figure 1B using wild-type COPII vesicles and the indicated semi-intact cell acceptor membranes. The reactions were incubated at 20°C or 29°C (highest temperature at which the *in vitro* assay remains active). RIGHT: One-stage transport reactions as in Figure 1A were incubated at 20°C or 29°C. Note that there are no significant fusion or transport defects in *pik1-83* membranes compared to WT. NA is the background level of transport in the absence of transport factors. The “-Acpt” condition represents the background level of fusion in the absence of added acceptor membranes. (B) Semi-intact cells were prepared from WT or *pik1-83* cells grown at 26°C and then shifted to 37°C for 1 h. Two-stage fusion reactions (LEFT) and diffusible vesicle experiments (RIGHT) were conducted as in panel A and Figure 1C, respectively, and incubated at 23°C or 29°C. The *pik1-83* semi-intact cell membranes displayed defects in vesicle fusion (~44% inhibition) and budding (~80% inhibition) after cells were grown at 37°C for 1 h. (A-B) Note that the *pik1-83* membranes did not display thermosensitive defects *in vitro* and suggests that the *pik1-83* encoded enzyme remains active at 29°C *in vitro* or that there is a sufficient pool of PI(4)P on acceptor membranes such that continual synthesis is not needed under conditions of the cell free transport assay. However, after shifting cells to 37°C for 1 hr, the semi-intact cell membranes displayed defects in vesicle budding and fusion suggesting that depletion of PI(4)P *in vivo* compromises ER and Golgi membrane function in these cell free assays.



## SUPPLEMENTAL REFERENCES

- Barlowe, C. (1997). Coupled ER to Golgi transport reconstituted with purified cytosolic proteins. *J. Cell Biol.* 139, 1097-1108.
- Beh, C.T., Cool, L., Phillips, J., and Rine, J. (2001). Overlapping functions of the yeast oxysterol-binding protein homologues. *Genetics* 157, 1117-1140.
- Brachmann, C.B., Davies, A., Cost, G.J., Caputo, E., Li, J., Hieter, P., and Boeke, J.D. (1998). Designer deletion strains derived from *Saccharomyces cerevisiae* S288C: a useful set of strains and plasmids for PCR-mediated gene disruption and other applications. *Yeast* 14, 115-132.
- Gray, A., Olsson, H., Batty, I.H., Priganica, L., and Peter Downes, C. (2003). Nonradioactive methods for the assay of phosphoinositide 3-kinases and phosphoinositide phosphatases and selective detection of signaling lipids in cell and tissue extracts. *Anal Biochem* 313, 234-245.
- Lewis, S.M., Poon, P.P., Singer, R.A., Johnston, G.C., and Spang, A. (2004). The ArfGAP Glo3 is required for the generation of COPI vesicles. *Mol Biol Cell* 15, 4064-4072.
- Maehama, T., Taylor, G.S., Slama, J.T., and Dixon, J.E. (2000). A sensitive assay for phosphoinositide phosphatases. *Anal Biochem* 279, 248-250.
- Prinz, W.A., Grzyb, L., Veenhuis, M., Kahana, J.A., Silver, P.A., and Rapoport, T.A. (2000). Mutants affecting the structure of the cortical endoplasmic reticulum in *Saccharomyces cerevisiae*. *J. Cell Biol.* 150, 461-474.
- Rossanese, O.W., Reinke, C.A., Bevis, B.J., Hammond, A.T., Sears, I.B., O'Connor, J., and Glick, B.S. (2001). A Role for actin, Cdc1p, and Myo2p in the inheritance of late golgi elements in *Saccharomyces cerevisiae*. *J. Cell Biol.* 153, 47-62.
- Yu, J.W., Mendrola, J.M., Audhya, A., Singh, S., Keleti, D., DeWald, D.B., Murray, D., Emr, S.D., and Lemmon, M.A. (2004). Genome-wide analysis of membrane targeting by *S. cerevisiae* pleckstrin homology domains. *Mol Cell* 13, 677-688.
- Zhu, H., Bilgin, M., Bangham, R., Hall, D., Casamayor, A., Bertone, P., Lan, N., Jansen, R., Bidlingmaier, S., Houfek, T., Mitchell, T., Miller, P., Dean, R.A., Gerstein, M., and Snyder, M. (2001). Global analysis of protein activities using proteome chips. *Science* 293, 2101-2105.
